# Supplementary material for: Cooperative hydrogen-bonding of the adenine–thymine pair as a strategy for lowering the limit of detection of thymine by surface-enhanced Raman spectroscopy
Source: Royal Society of Chemistry journal article supplement (doi:10.1039/c6an00222f), 2016-01-01
Supplement: c6an00222f1.pdf [file c6an00222f1.pdf]

## SUPPLEMENTARY INFORMATION

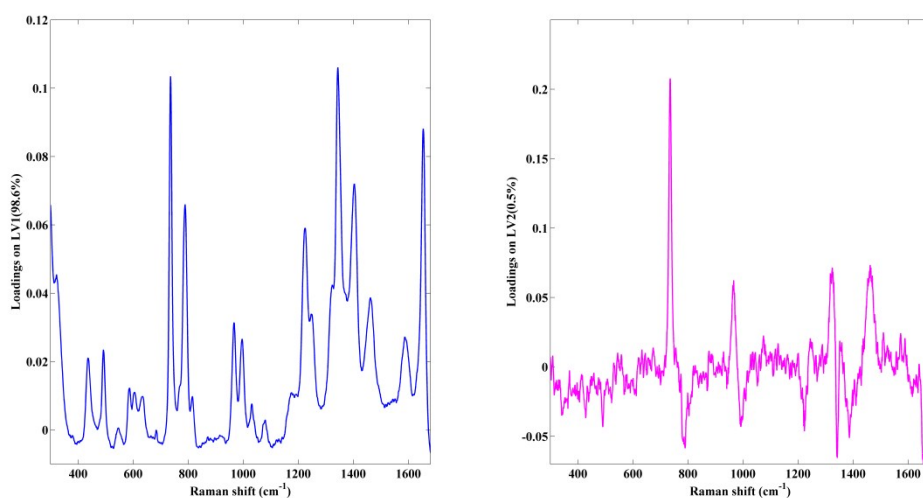

Figure S1. Latent variables (loadings) 1 (blue) and 2 (magenta) from the PLS model for concentration  $C_2$ .

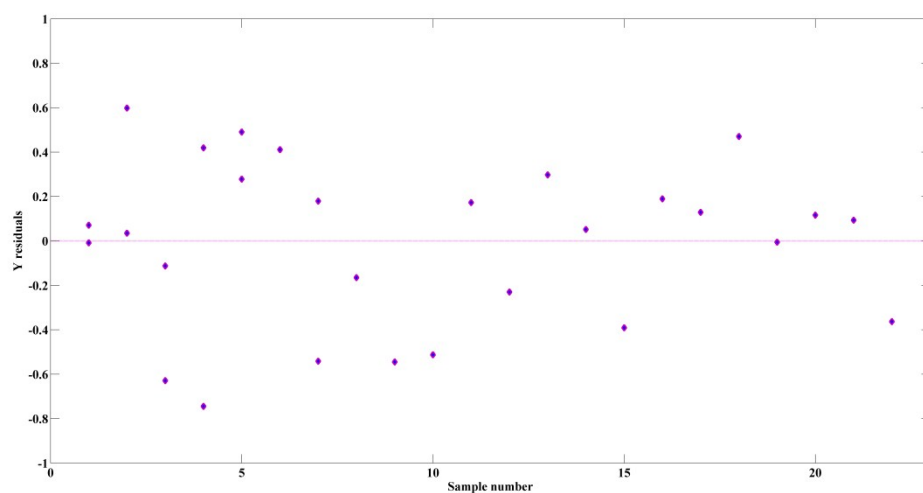

Figure S2. Residuals for the linear fitting of PLS model for concentration  $C_2$ .

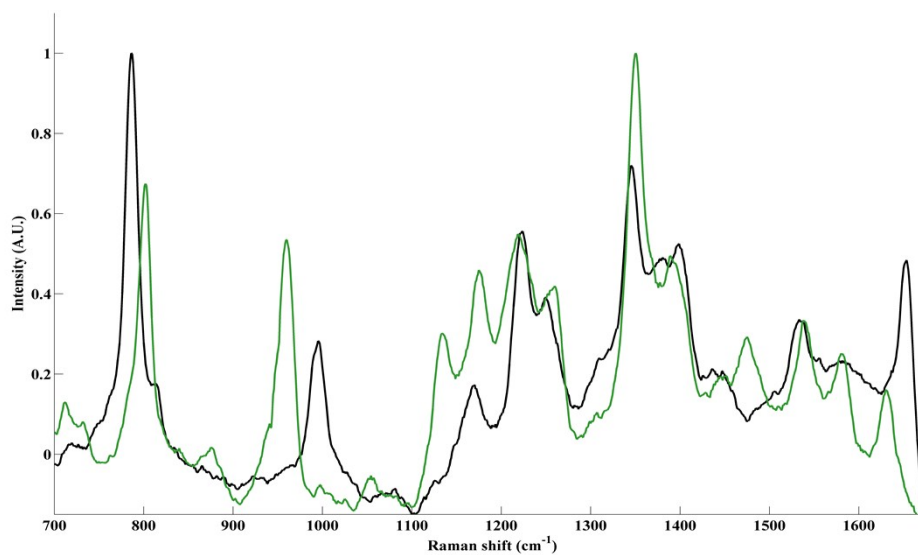

Figure S3. SERS spectra of aqueous solutions of thymine (black) and uracil (green) on AuNPs (Intensity was normalized for comparison).

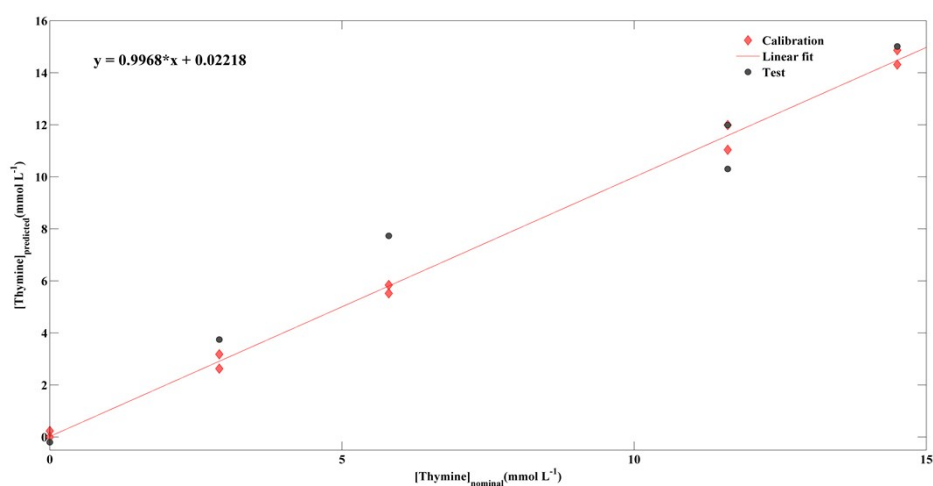

Figure S4. PLS model for indirect determination of thymine in presence of uracil  $2.5 \times 10^{-3} \text{ mol L}^{-1}$  as interference. Calibration (red) and test (black) samples are shown.
